# Supplementary material for: Metacognition in dogs: Do dogs know they could be wrong?
Source: PubMed Central journal article supplement (PMC6276073; doi:10.3758/s13420-018-0367-5), 2018-11-12
Supplement: 13420_2018_367_MOESM1_ESM.pdf [file 13420_2018_367_MOESM1_ESM.pdf]

## Supplemental tables

**Table 1.** List of a total of 97 dogs that participated in one of the three experiments, indicating breed, gender, experiment, and age at time of testing.

| <b>Name</b> | <b>Breed</b>                                        | <b>Gender</b> | <b>Age<br/>(years)</b> | <b>Exp</b> | <b>Rewarded<br/>with</b> |
|-------------|-----------------------------------------------------|---------------|------------------------|------------|--------------------------|
| Paul        | Tibet Terrier                                       | Male          | 8                      | 1          | food                     |
| Jimmy       | Labrador                                            | Male          | 7                      | 1          | food                     |
| Balou       | Flat coated Retriever                               | Male          | 4                      | 1          | food                     |
| Balou       | Mongrel (Riesenschnauzer)                           | Male          | 6                      | 1          | food                     |
| Eloy        | Riesenschnauzer                                     | Male          | 2                      | 1          | Food                     |
| Cheyenne    | Malinois                                            | Female        | 3                      | 1          | food                     |
| Bonny       | American Staffordshire<br>Terrier                   | Female        | 8                      | 1          | food                     |
| Leo         | Mongrel (Australian Shepherd<br>x Border Collie)    | Male          | 6                      | 1          | food                     |
| Jenobi      | Collie                                              | Female        | 3                      | 1          | food                     |
| Lotte       | Mongrel (Labrador)                                  | Female        | 7                      | 1          | food                     |
| Nicky       | Malinois                                            | Female        | 1.5                    | 1          | food                     |
| Wanja       | Mongrel                                             | Female        | 11                     | 1          | food                     |
| Rocky       | Mongrel (American<br>Staffordshire Terrier x Boxer) | Male          | 7                      | 1          | food                     |
| Linus       | Golden Retriever                                    | Male          | 4                      | 1          | food                     |
| Gonzo       | Labrador                                            | Male          | 3                      | 1          | food                     |
| Bootsmann   | Labrador                                            | Male          | 6                      | 1          | food                     |
| Punk        | Mongrel (German Shepherd x                          | Male          | 7                      | 1          | food                     |

|         |                                           |        |     |   |      |
|---------|-------------------------------------------|--------|-----|---|------|
|         | Labrador)                                 |        |     |   |      |
| Bono    | Pudel                                     | Male   | 2   | 1 | food |
| Polly   | Mongrel (German Shepherd)                 | Female | 8   | 1 | food |
| Enna    | Airdale Terrier                           | Female | 3   | 1 | food |
| Aura    | Riesenschnauzer                           | Female | 3   | 1 | food |
| Gina    | Mongrel (Labrador)                        | Female | 4   | 1 | food |
| CJ      | Border Collie                             | Female | 4   | 1 | food |
| Wilma   | German Shepherd                           | Female | 5   | 1 | food |
| Arkos   | Appenzeller Sennenhund                    | Male   | 1.5 | 1 | toy  |
| Marco   | Mongrel (German Shepherd)                 | Male   | 4   | 1 | toy  |
| Ronja   | Mongrel (Jack Russel Terrier)             | Female | 4   | 1 | toy  |
| Rudi    | Airdale Terrier                           | Male   | 3   | 1 | toy  |
| Max     | Airdale Terrier                           | Male   | 8   | 1 | toy  |
| Sydney  | Border Collie                             | Male   | 2   | 1 | toy  |
| Balou   | Mongrel (Border Collie x<br>Labrador)     | Male   | 5   | 1 | toy  |
| Cherry  | Mongrel                                   | Female | 5   | 1 | toy  |
| Dusty   | Border Collie                             | Male   | 2   | 1 | toy  |
| Pauline | Portugiesischer Wasserhund                | Female | 5   | 1 | toy  |
| Karah   | Labrador Retriever                        | Female | 2   | 1 | toy  |
| Emily   | Labrador Retriever                        | Female | 2   | 1 | toy  |
| Fanny   | Mongrel (Rottweiler)                      | Female | 9   | 1 | toy  |
| Asta    | Fox Terrier                               | Female | 4   | 1 | toy  |
| Lea     | Mongrel (Rottweiler x<br>German Shepherd) | Female | 7   | 1 | toy  |

|          |                                              |        |     |   |      |
|----------|----------------------------------------------|--------|-----|---|------|
| Luna     | Mongrel (Dackel)                             | Female | 1.5 | 1 | toy  |
| Bones    | German Shepherd                              | Male   | 6   | 1 | toy  |
| Fraya    | Mongrel (Dalmatiner)                         | Female | 2   | 1 | toy  |
| Trulla   | Border Collie                                | Female | 1.5 | 1 | toy  |
| Bessy    | Doberman                                     | Female | 2   | 1 | toy  |
| Sidney   | Border Collie                                | Male   | 3   | 1 | toy  |
| Fara     | Mongrel (Border Collie x<br>German Shepherd) | Female | 2   | 1 | toy  |
| Ronja    | Mongrel (Labrador)                           | Female | 2   | 1 | toy  |
| Piefke   | Cocker Spaniel                               | Male   | 1.5 | 1 | toy  |
| Guenni   | Whippet                                      | Male   | 1   | 2 | food |
| Maxl     | Altdeutscher Fuchs                           | Male   | 2   | 2 | food |
| Souris   | Papillon                                     | Female | 2   | 2 | food |
| Matilda  | DSH, Mix                                     | Female | 1   | 2 | food |
| Aimee    | Collie                                       | Female | 2   | 2 | food |
| Karou    | Berger des Pyrenees                          | Male   | 4   | 2 | food |
| Nilsson  | Mix                                          | Male   | 2   | 2 | food |
| Tschaika | Mix, Sheltie, Spitz                          | Female | 6   | 2 | food |
| Laila    | Golden Retriever                             | Female | 2   | 2 | food |
| Colin    | Collie, Mix                                  | Male   | 1   | 2 | food |
| Sparky   | Boxer, Mix                                   | Male   | 1   | 2 | food |
| Atze     | Rauhaardackel                                | Male   | 5   | 2 | food |
| Mali     | Mix                                          | Male   | 3   | 2 | food |
| Felix    | Mix                                          | Male   | 5   | 2 | food |
| Via      | Dobermann                                    | Female | 1   | 2 | food |

|         |                           |        |    |   |      |
|---------|---------------------------|--------|----|---|------|
| Polly   | Beagle                    | Female | 1  | 2 | food |
| Judy    | Franz. Bulldogge          | Female | 2  | 2 | food |
| Blue    | Franz. Bulldogge          | Male   | 2  | 2 | food |
| Barry   | Mix                       | Male   | 3  | 2 | food |
| Kitana  | Mix, Dobermann, DSH       | Female | 6  | 2 | food |
| Feli    | Jack Russel               | Female | 4  | 2 | food |
| Mira    | Podenco, Magyar Vizsla    | Female | 4  | 2 | food |
| Migo    | Jack Russel               | Male   | 1  | 2 | food |
| Daisy   | Boerbel                   | Female | 5  | 2 | food |
| Bill    | Golden Retriever          | Male   | 7  | 3 | food |
| Caesar  | German Shepherd           | Male   | 8  | 3 | food |
| Cero    | German Shepherd           | Male   | 1  | 3 | food |
| Cora    | Bavarian Mountain Hound   | Female | 6  | 3 | food |
| Corgo   | Malinois                  | Male   | 2  | 3 | food |
| Elsie   | Mongrel                   | Female | 5  | 3 | food |
| Emma    | Dalmatian                 | Female | 3  | 3 | food |
| Emma    | Golden Retriever          | Female | 2  | 3 | food |
| Hugsy   | Husky                     | Female | 1  | 3 | food |
| Juna    | Mongrel                   | Female | 1  | 3 | food |
| Kajsa   | Australian Shepherd       | Female | 7  | 3 | food |
| Krümel  | Mongrel                   | Female | 10 | 3 | food |
| Lobo    | Mongrel                   | Male   | 3  | 3 | food |
| Matilda | Mongrel                   | Female | 1  | 3 | food |
| Mojo    | Staffordshire Bullterrier | Female | 2  | 3 | food |
| Nana    | Mongrel                   | Female | 4  | 3 | food |

|         |                  |        |    |   |      |
|---------|------------------|--------|----|---|------|
| Nikita  | Border Terrier   | Female | 1  | 3 | food |
| Pantali | Malinois         | Female | 6  | 3 | food |
| Paula   | Podenco          | Female | 8  | 3 | food |
| Poldi   | Mongrel          | Male   | 4  | 3 | food |
| Sidi    | Mongrel          | Male   | 12 | 3 | food |
| Skottie | Spaniel          | Male   | 7  | 3 | food |
| Spike   | Mongrel          | Male   | 11 | 3 | food |
| Willy   | Golden Retriever | Male   | 6  | 3 | food |
| Yoshi   | Mongrel          | Male   | 10 | 3 | food |

---

**Table 2.** Overview of total number of sessions, sessions per testing day, trials per session and total number of trials listed for the three experiments.

|                          | <b>Exp. 1</b> | <b>Exp. 2</b> | <b>Exp. 3</b> |
|--------------------------|---------------|---------------|---------------|
| Number of sessions       | 4             | 4             | 6             |
| Sessions per testing day | 2             | 2             | 3             |
| Trials per session       | 12            | 16            | 24            |
| Total number of trials   | 48            | 64            | 48            |

---

**Table 3.** Time variations for the two conditions (U = Unblocked trials, B = Blocked trials) and four different time delays (5, 20, 60, and 120 s) resulting in eight possible types of trials in Experiment 3.

| <b>Delay</b> | <b>Unblocked</b> | <b>Blocked</b> |
|--------------|------------------|----------------|
| 5            | 5U               | 5B             |
| 20           | 20U              | 20B            |
| 60           | 60U              | 60B            |
| 120          | 120U             | 120B           |

**Table 4.** Overview of the Coding Scheme including Checking, Correct/Incorrect choices, and Latency

| <b>Term</b>           | <b>Definition</b>                                                                                                                                                                                                                                                                                                                                                                                                                             |
|-----------------------|-----------------------------------------------------------------------------------------------------------------------------------------------------------------------------------------------------------------------------------------------------------------------------------------------------------------------------------------------------------------------------------------------------------------------------------------------|
| <b>Checking</b>       | It was coded whether dogs checked through the outside of the fence structure. More precisely, we looked for any behavior of looking, sniffing, or scratching, which had to occur less than 10 cm from the gap in combination with hesitating, i.e. pausing at least half a second before selecting a side. Furthermore, we looked at which side the subjects checked before choosing one side and whether the chosen side was correct or not. |
| <b>Correct choice</b> | A correct choice, which also had to be the dog's first choice, was defined as the chosen barrier where the reward was hidden. The subject had to be at least with both front paws and the shoulder behind the outer side of the barrier where the food was baited.                                                                                                                                                                            |
| <b>Latency</b>        | We measured the latency between the starting signal including the release of the dog until the first choice, no matter if the choice was correct or incorrect. Furthermore, latency was only noted when there was no checking behavior in order to eliminate the additional time spent checking.                                                                                                                                              |

**Supplemental Figures**

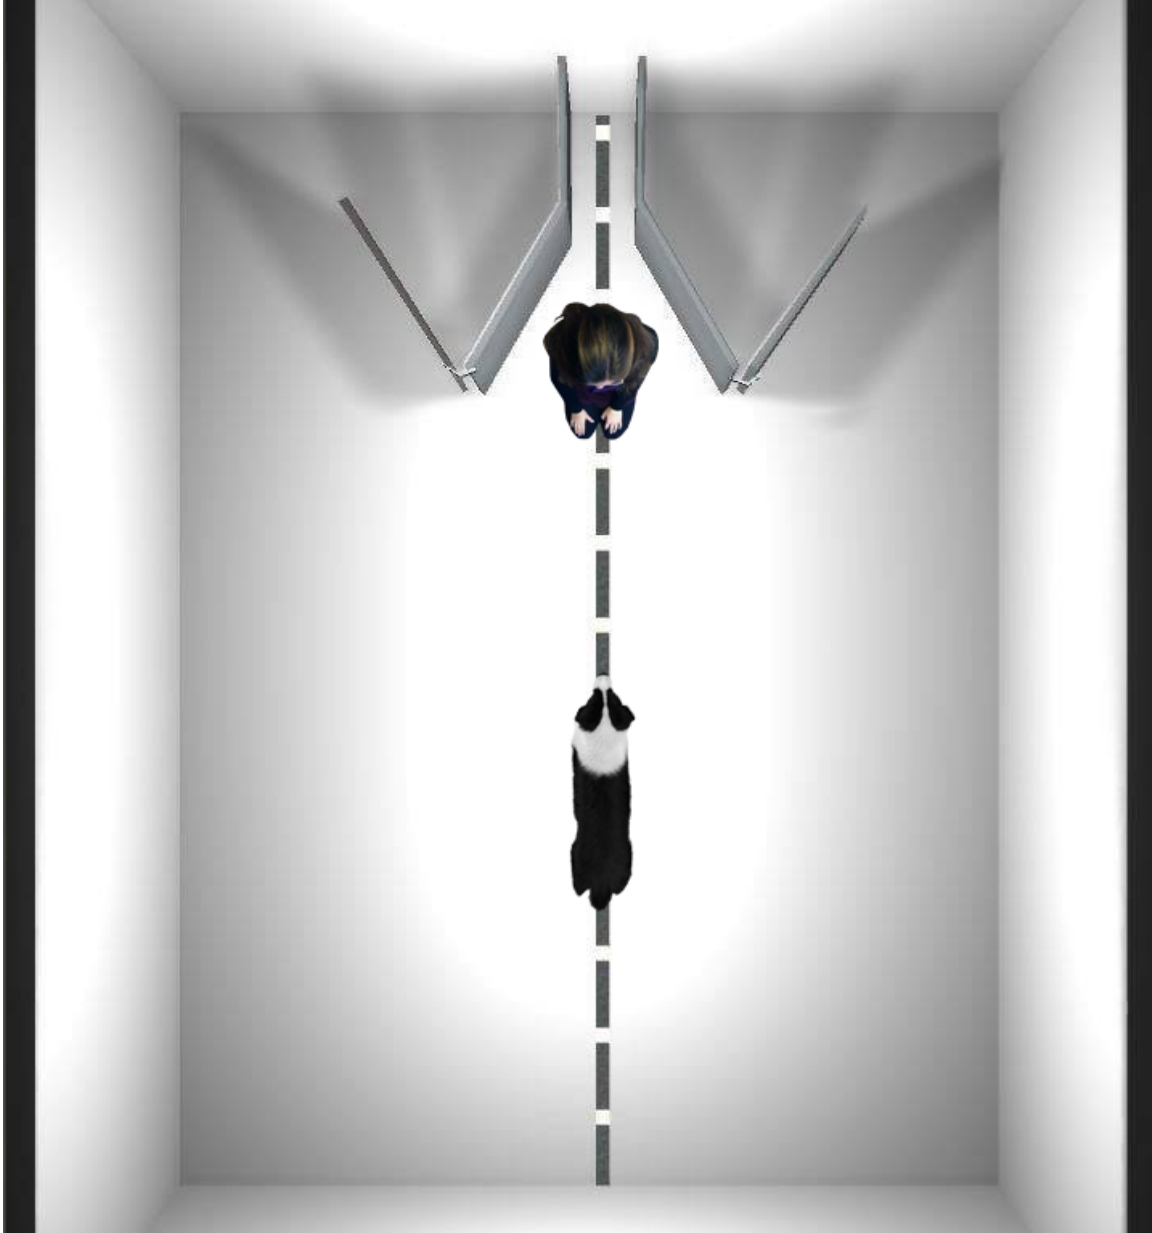

**Figure 1.** Experimental set-up depicted from the aerial perspective. The two-part apparatus consisted of two V-shaped wooden barriers (1.20 x 1.00 m) that were connected with a flexible hinge. The gap of approximately 2 cm allowed for checking.



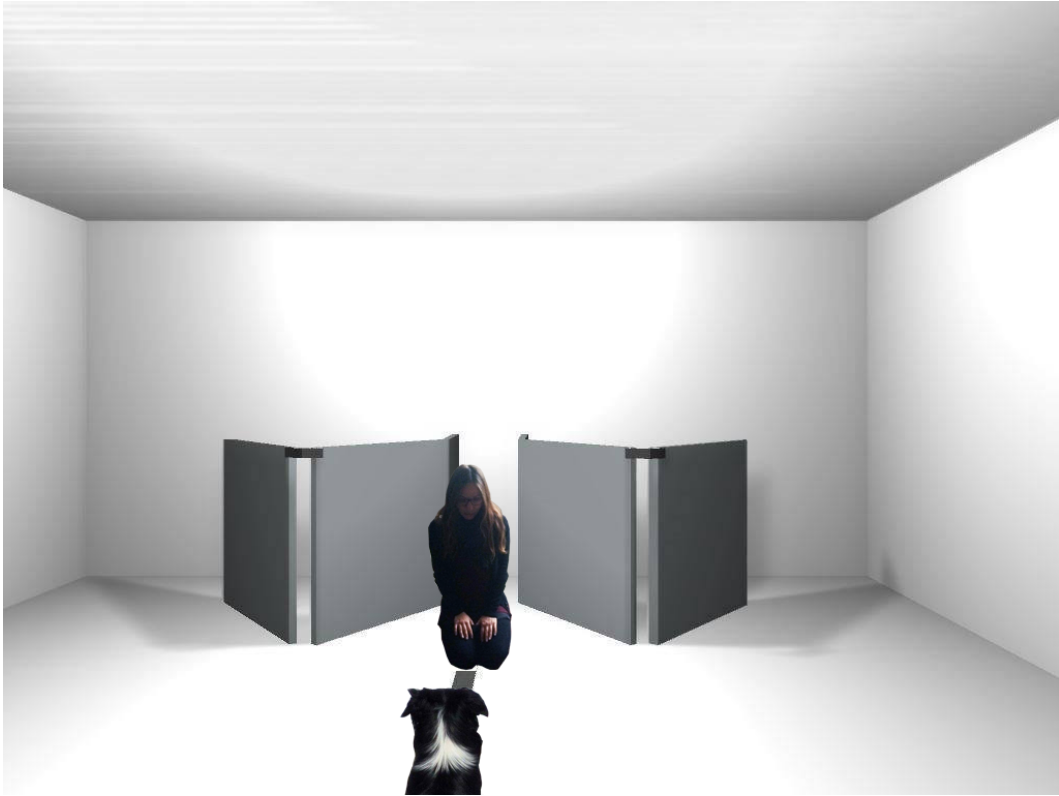

**Figure 2.** The experimental set-up of the apparatus from E2's perspective. As depicted, E1 sits in a neutral pose in the middle between both fences and does not give any nonverbal cues that could reveal the reward's location.

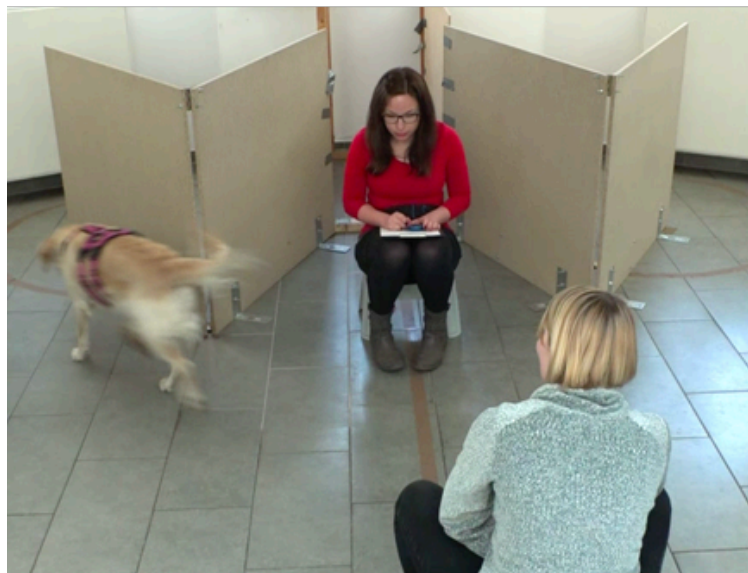

**Figure 3.** View from the camera of a dog selecting one side.
